# Supplementary material for: Synthesis, spectroscopic characterization, X-ray structure and electrochemistry of new bis(1,2-diaminocyclohexane)gold(iii) chloride compounds and their anticancer activities against PC3 and SGC7901 cancer cell lines
Source: Royal Society of Chemistry journal article supplement (doi:10.1039/c3nj01624b), 2014-01-01
Supplement: c3nj01624b1.pdf [file c3nj01624b1.pdf]

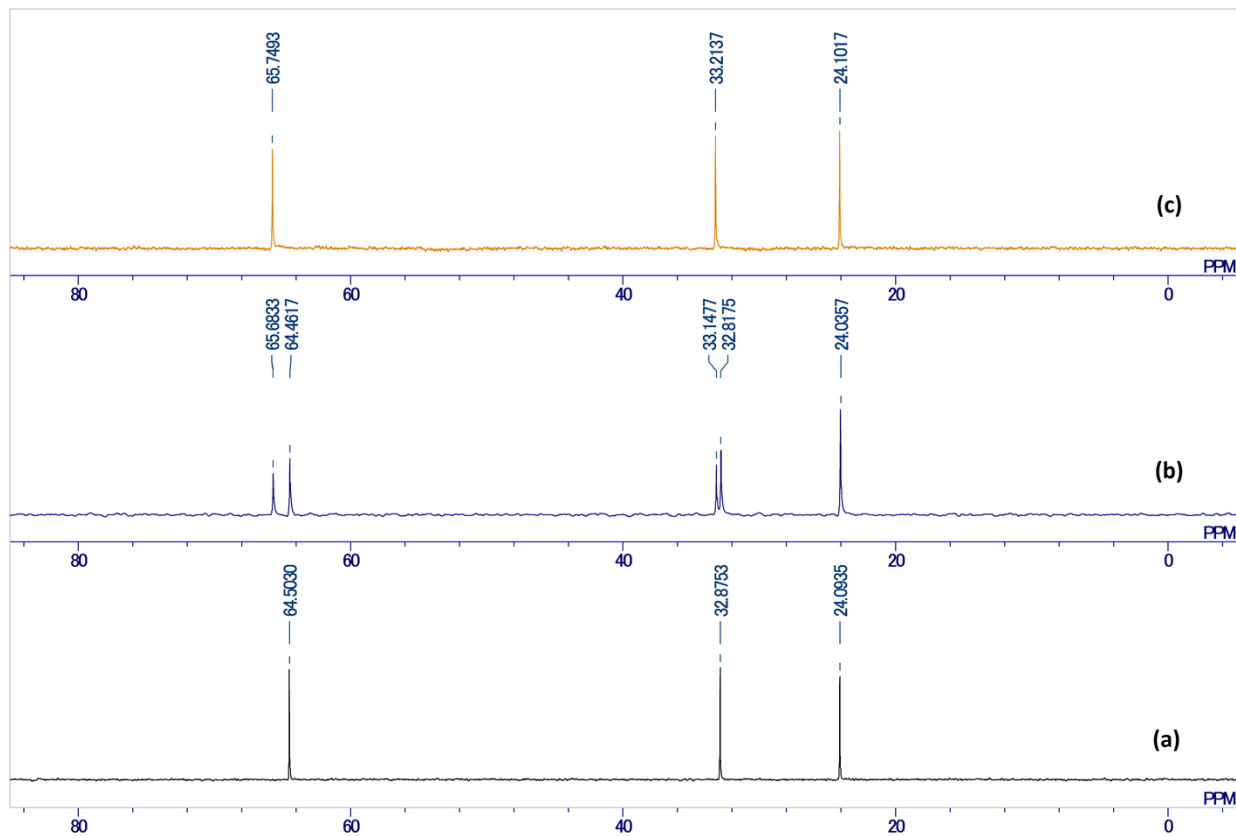

**Figure S1** Solution  $^{13}\text{C}\{^1\text{H}\}$  NMR spectra of : (a) compound **2**, [*trans*-(±)-1,2-DACH] $_2$ Au(III)Cl $_3$ , (b) compound **2c**, the co-crystal and (c) the mono chelate, [*trans*-(±)-1,2-(DACH)AuCl $_2$ ]Cl.

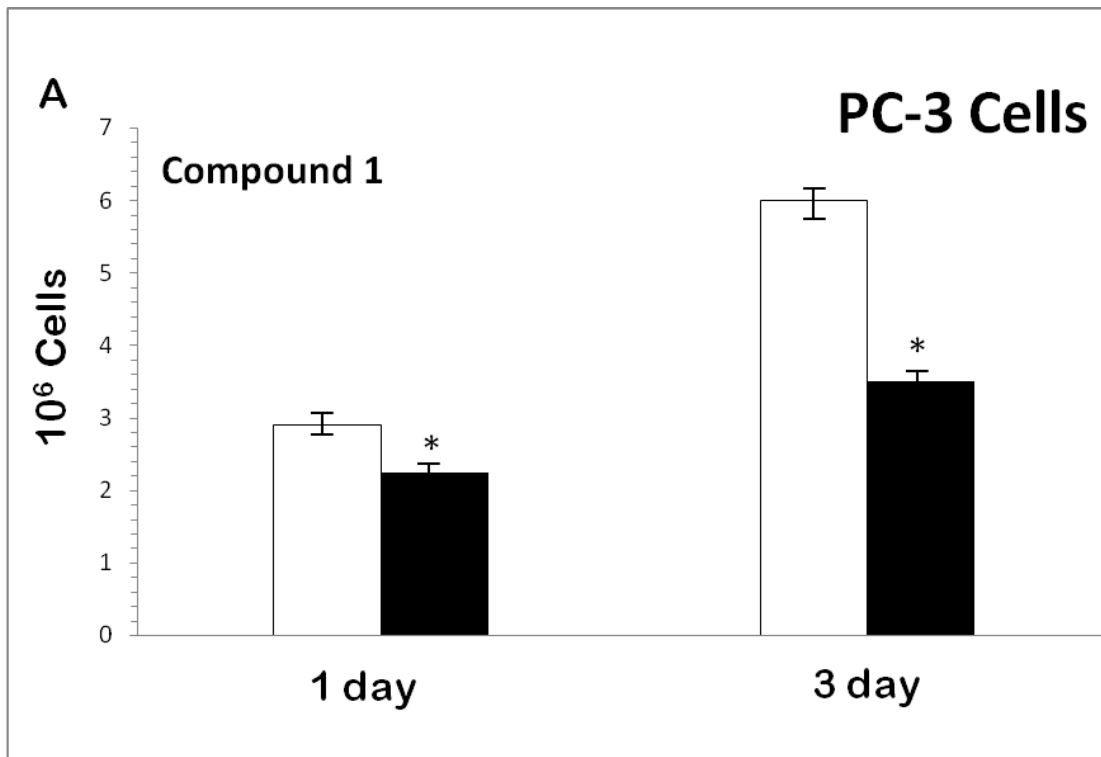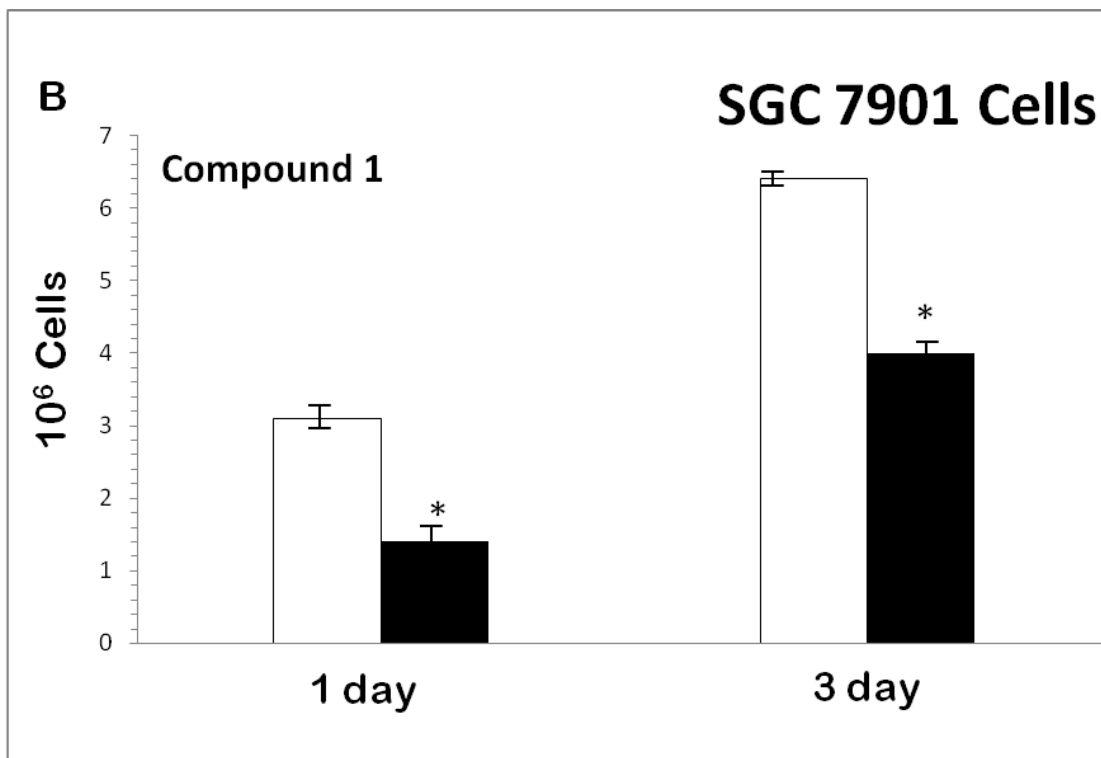

**Figure S2** Time dependent inhibitory effect of 10  $\mu$ M compound 1 on growth of (A) PC3 and (B) SGC7901 cells in 1 day and 3 days using MTT assay. Results were expressed as the mean, SD \*P<0.05.

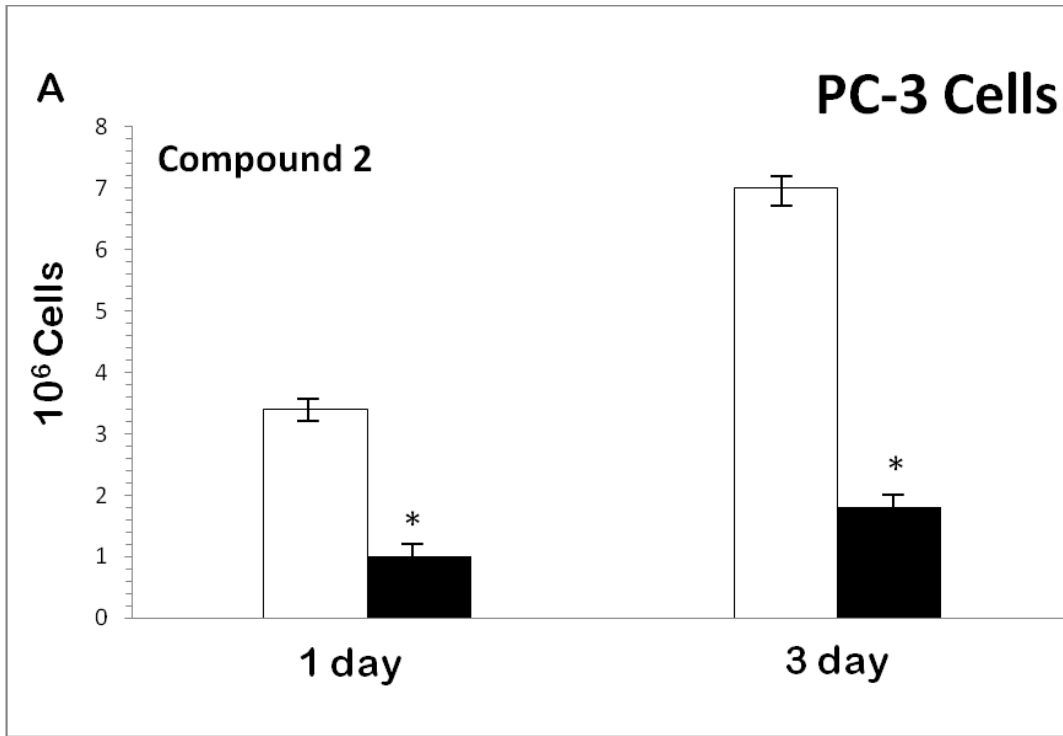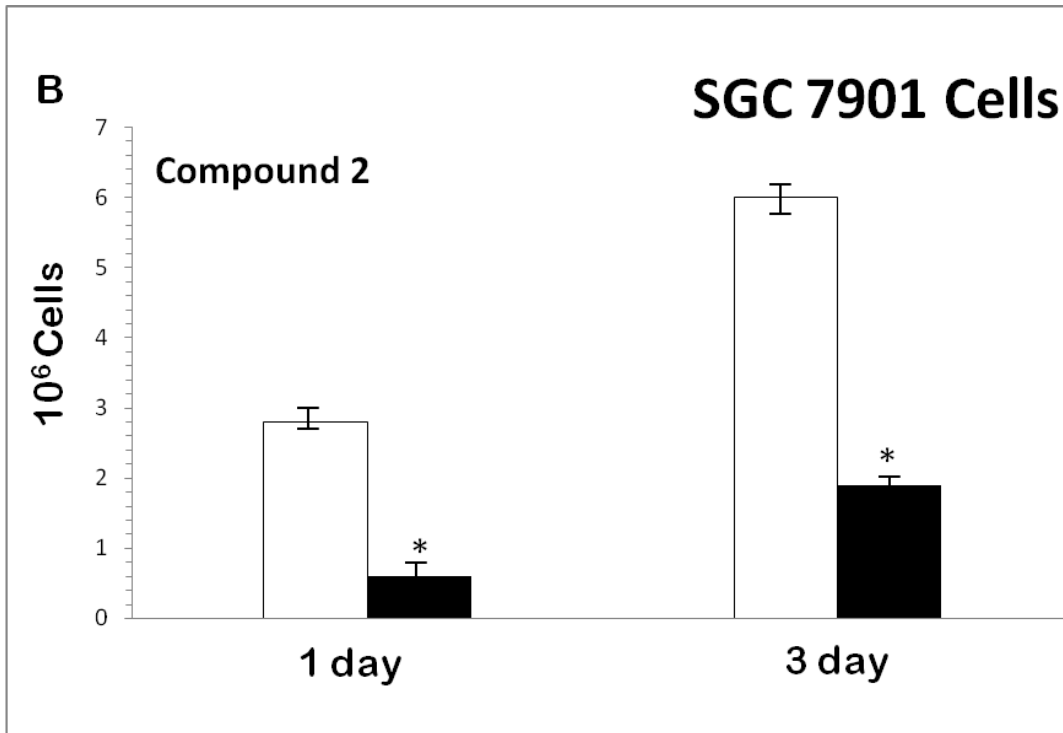

**Figure S3** Time dependent inhibitory effect of 10  $\mu$ M compound 2 on growth of (A) PC3 and (B) SGC7901 cells in 1 day and 3 days using MTT assay. Results were expressed as the mean, SD \*P<0.05.

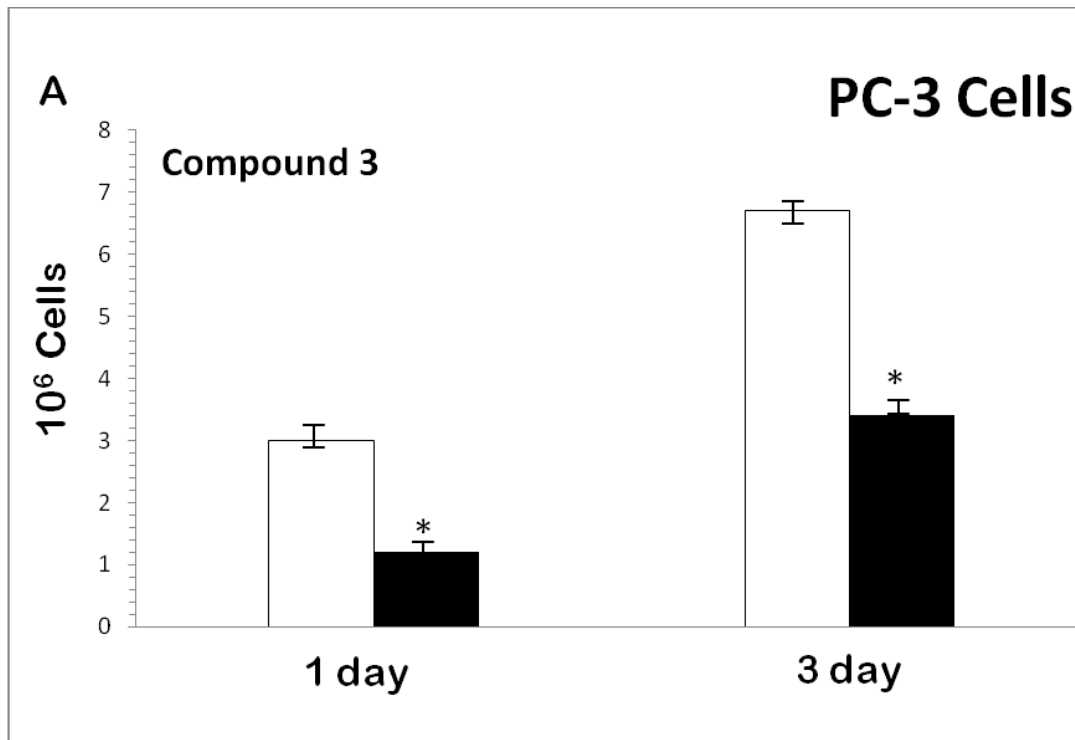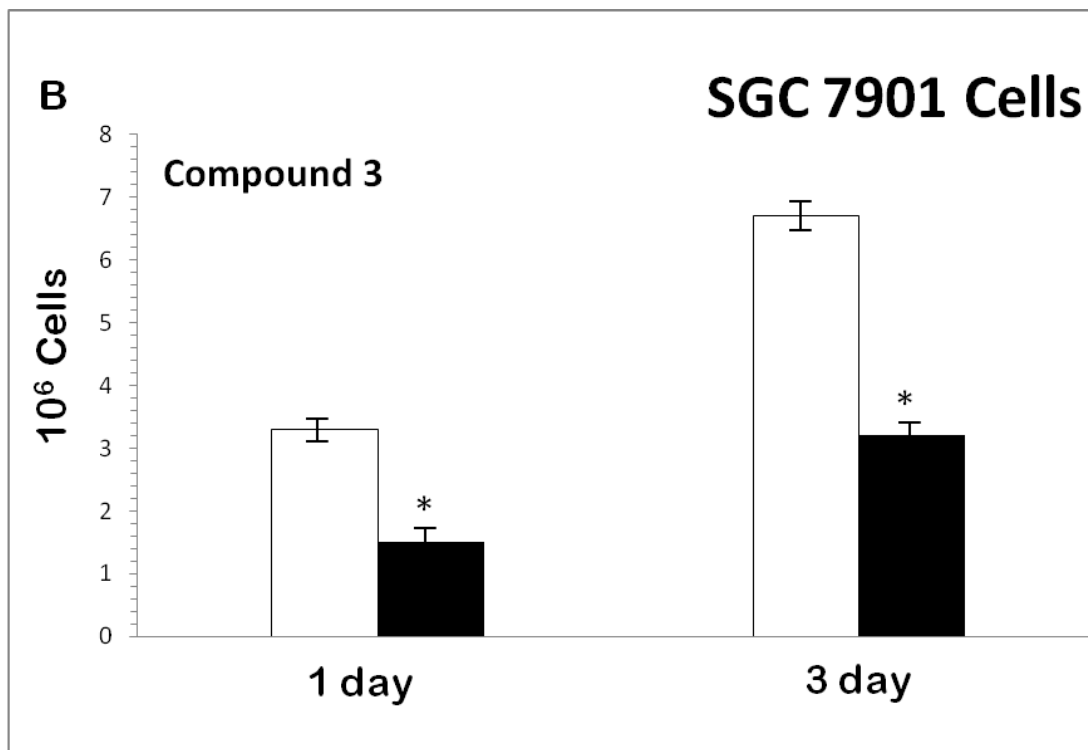

**Figure S4** Time dependent inhibitory effect of 10  $\mu$ M compound **3** on growth of (A) PC3 and (B) SGC7901 cells in 1 day and 3 days using MTT assay. Results were expressed as the mean, SD \*P<0.05.

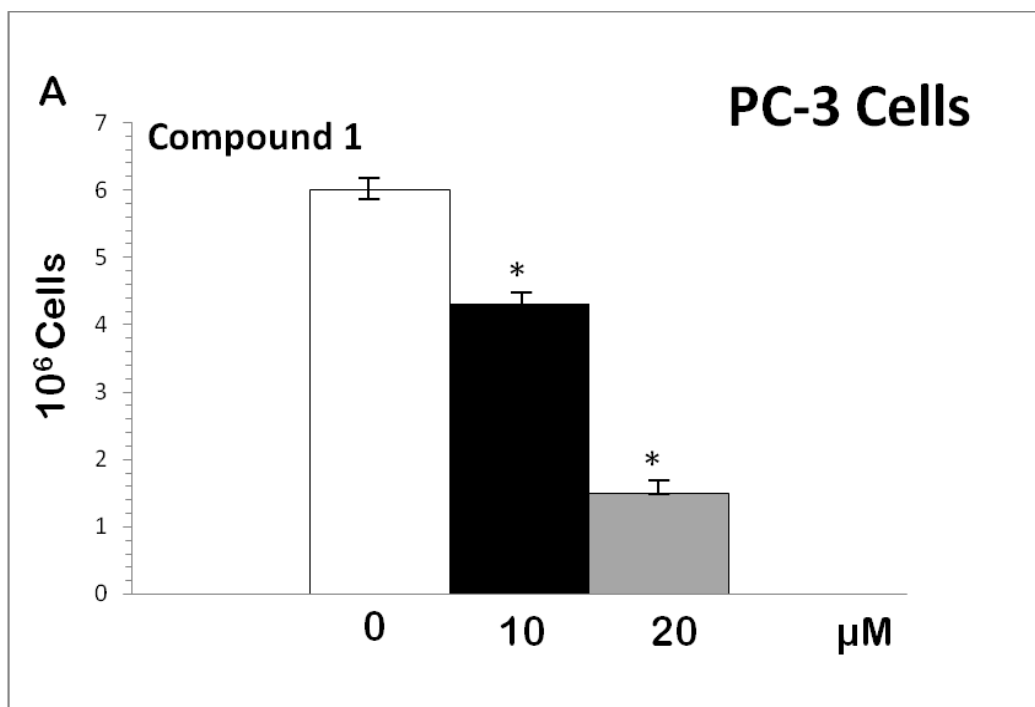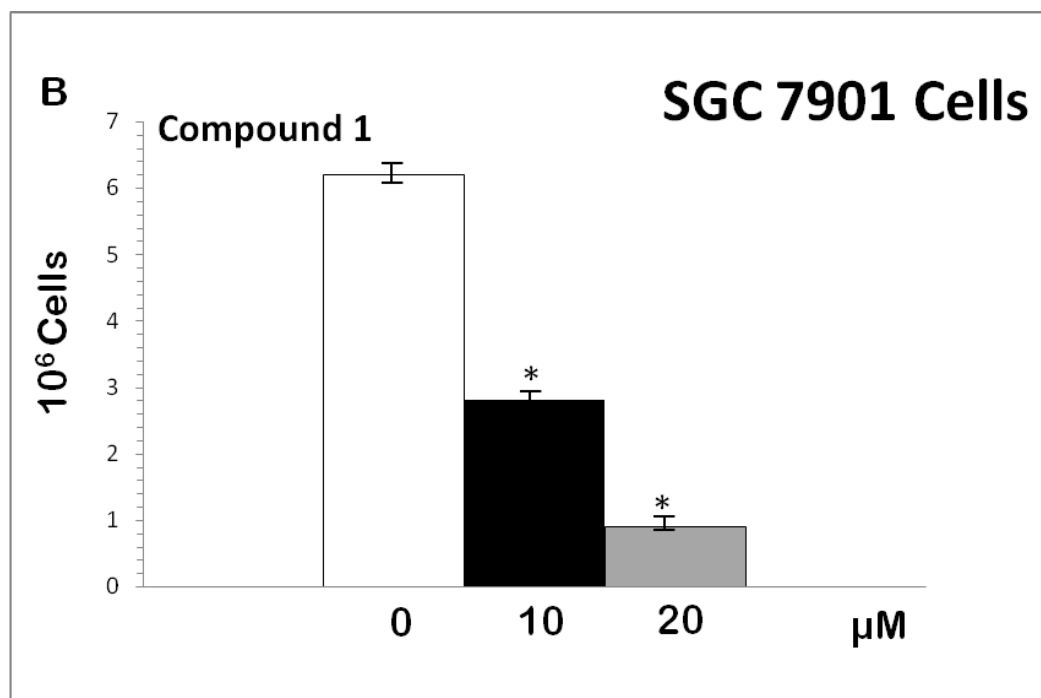

**Figure S5** Concentration dependent inhibitory effects of 10, 20 and 30  $\mu\text{M}$  compound 1 on growth of (A) PC3 and (B) SGC7901 cells in 1 day using MTT assay. Results were expressed as the mean, SD \* $P < 0.05$ .

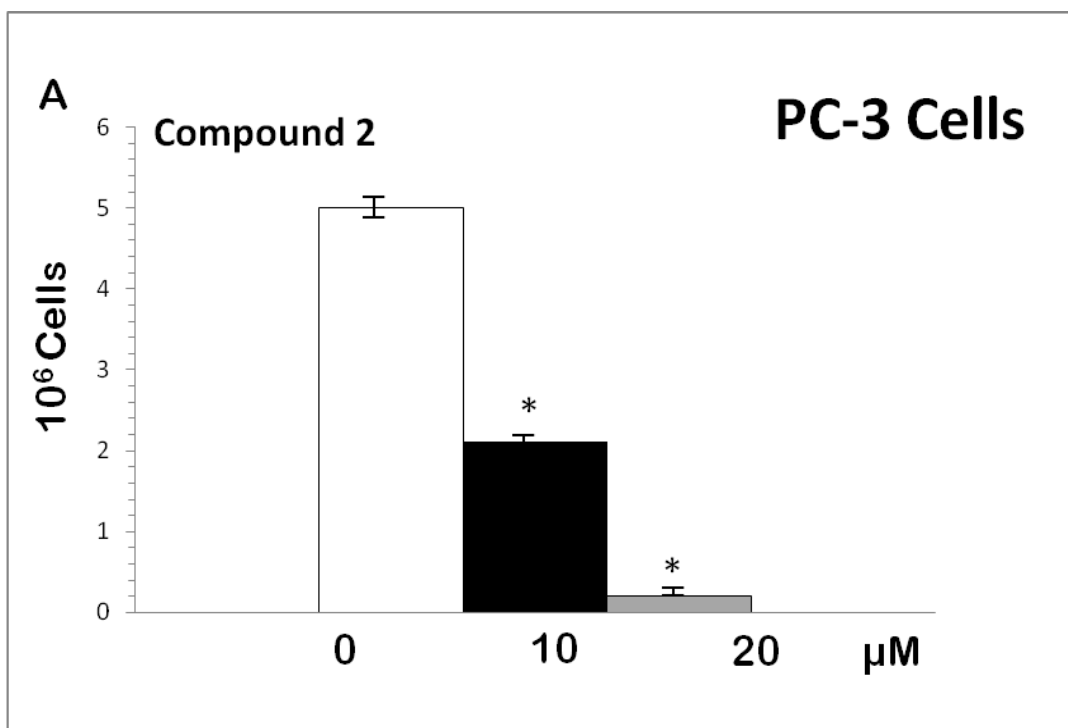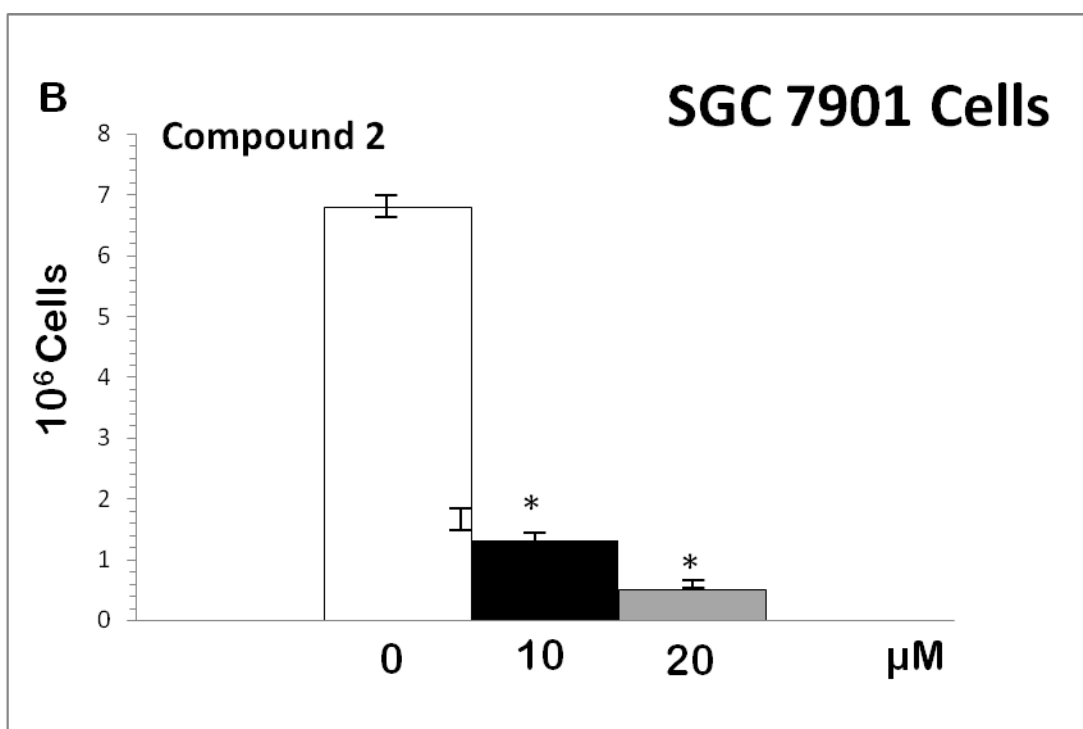

**Figure S6** Concentration dependent inhibitory effects of 10, 20 and 30  $\mu\text{M}$  compound **2** on growth of (A) PC3 and (B) SGC7901 cells in 1 day using MTT assay. Results were expressed as the mean, SD \* $P < 0.05$ .

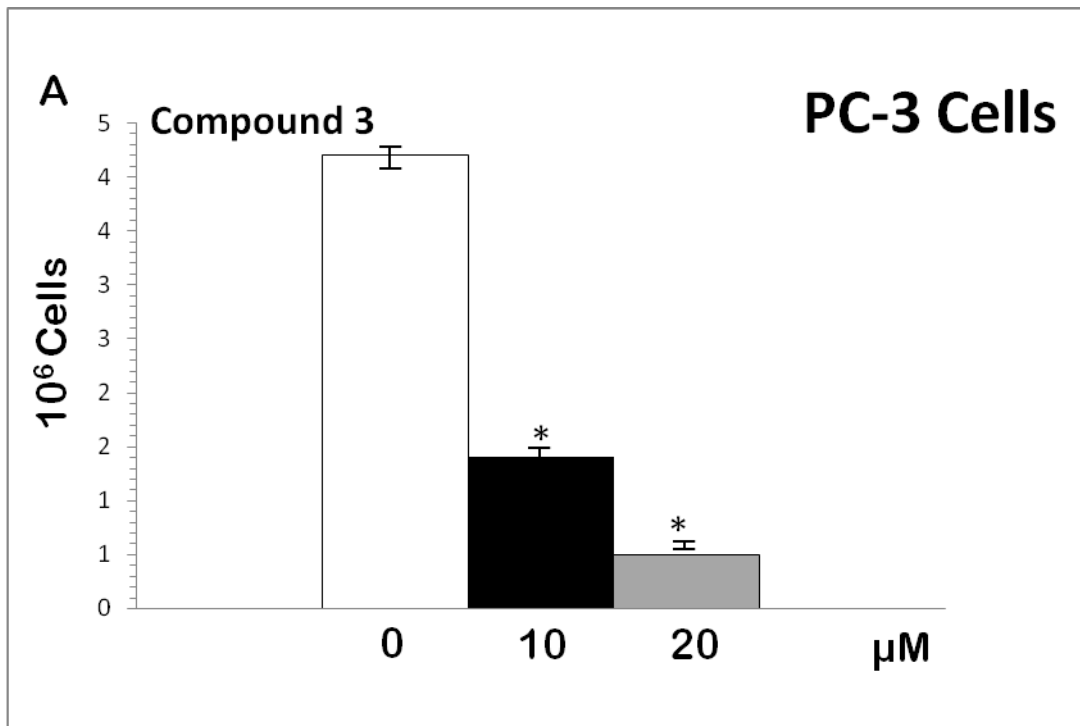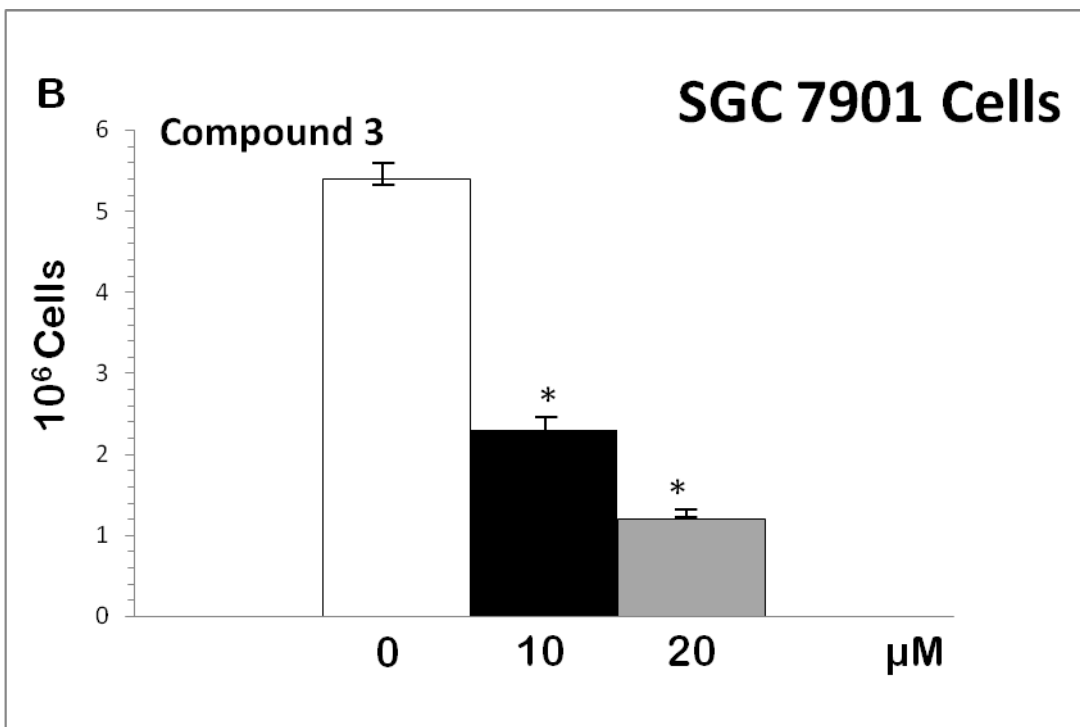

**Figure S7** Concentration dependent inhibitory effects of 10, 20 and 30  $\mu\text{M}$  compounds **3** on growth of (A) PC3 and (B) SGC7901 cells in 1 day using MTT assay. Results were expressed as the mean, SD \* $P < 0.05$ .

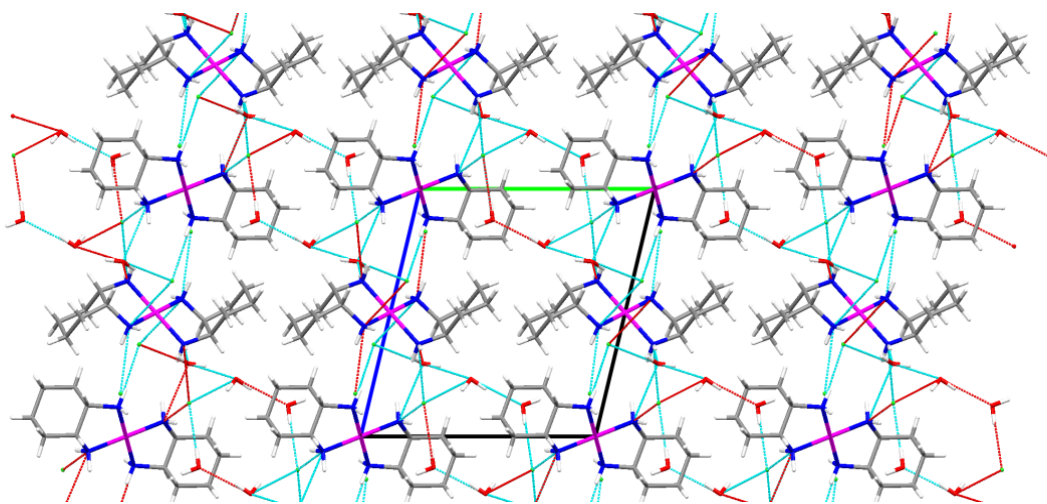

**Figure S8** Hydrogen bonding network in compound **1**.



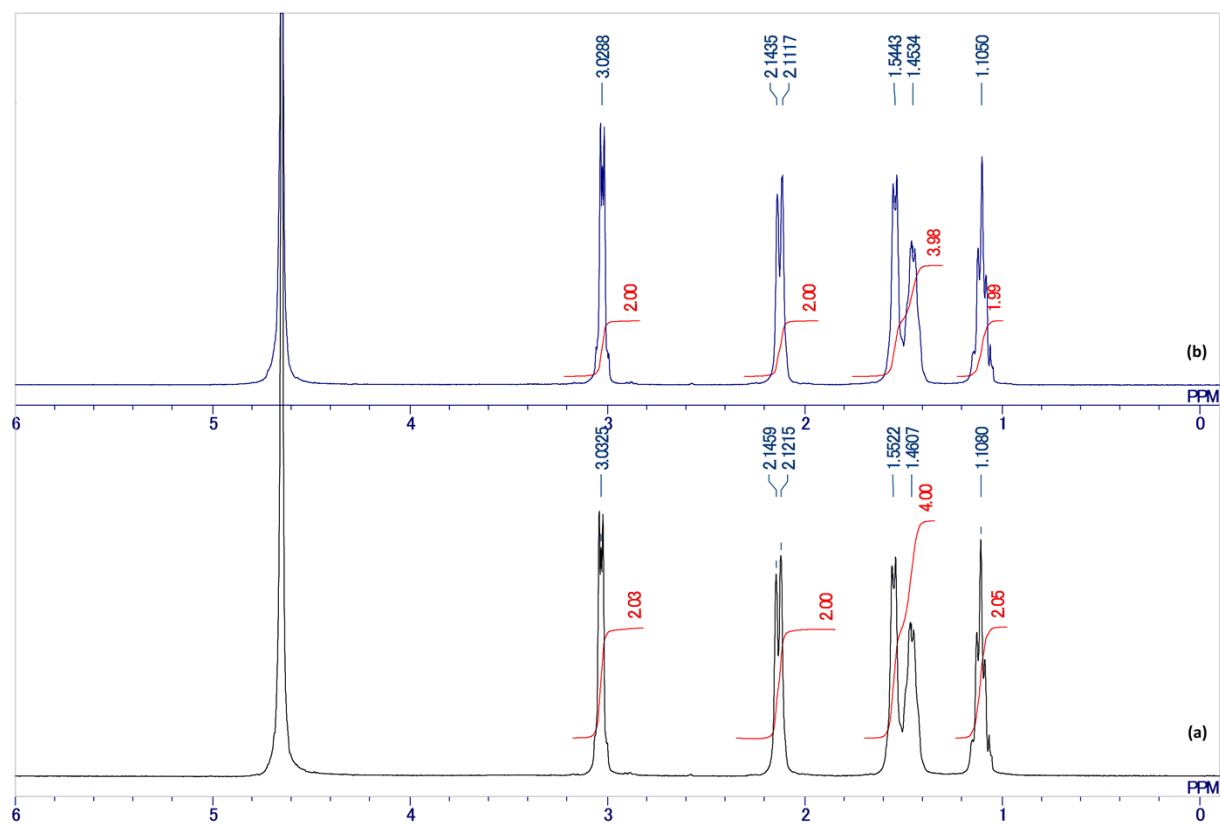

**Figure S9**  $^1\text{H}$  NMR spectrum of compound **2** in  $\text{D}_2\text{O}$  (a) just after mixing and (b) 3 days.

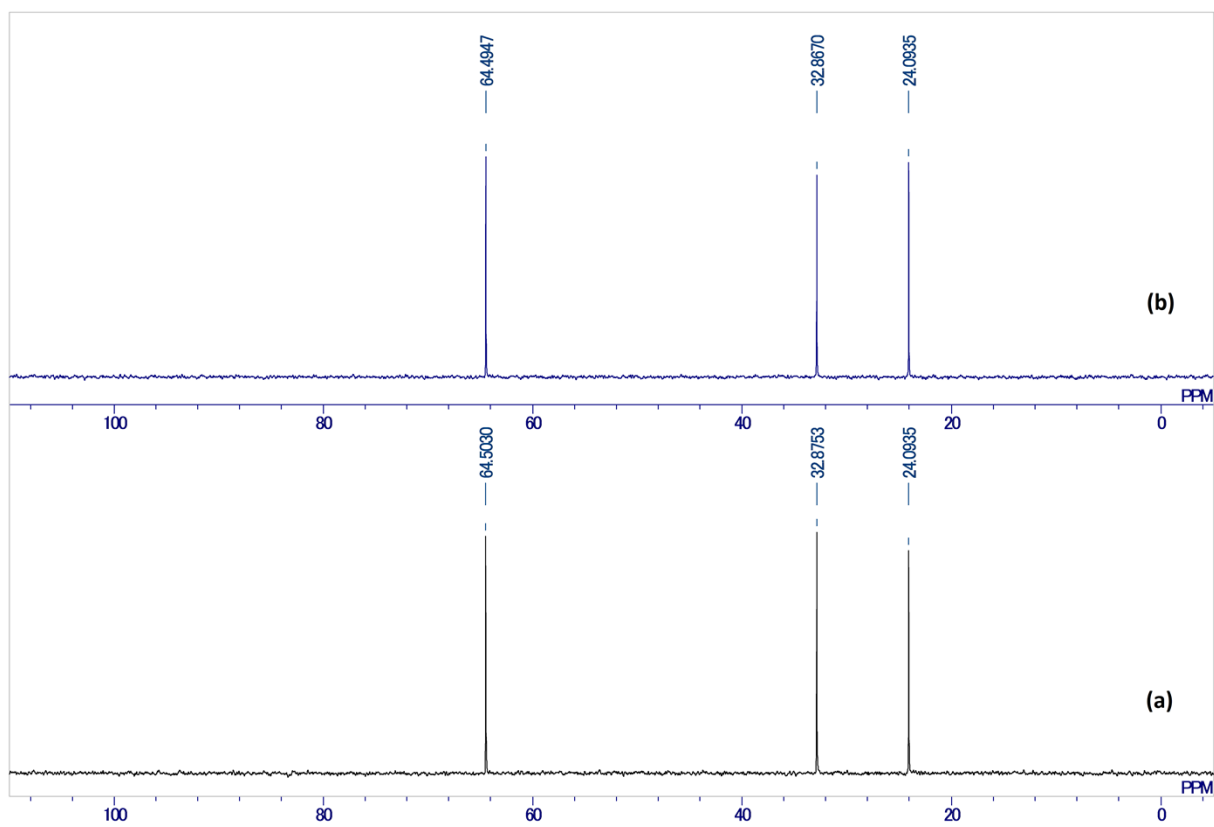

**Figure S10**  $^{13}\text{C}\{^1\text{H}\}$  NMR spectrum of compound **2** in  $\text{D}_2\text{O}$  (a) after mixing and (b) 3 days.

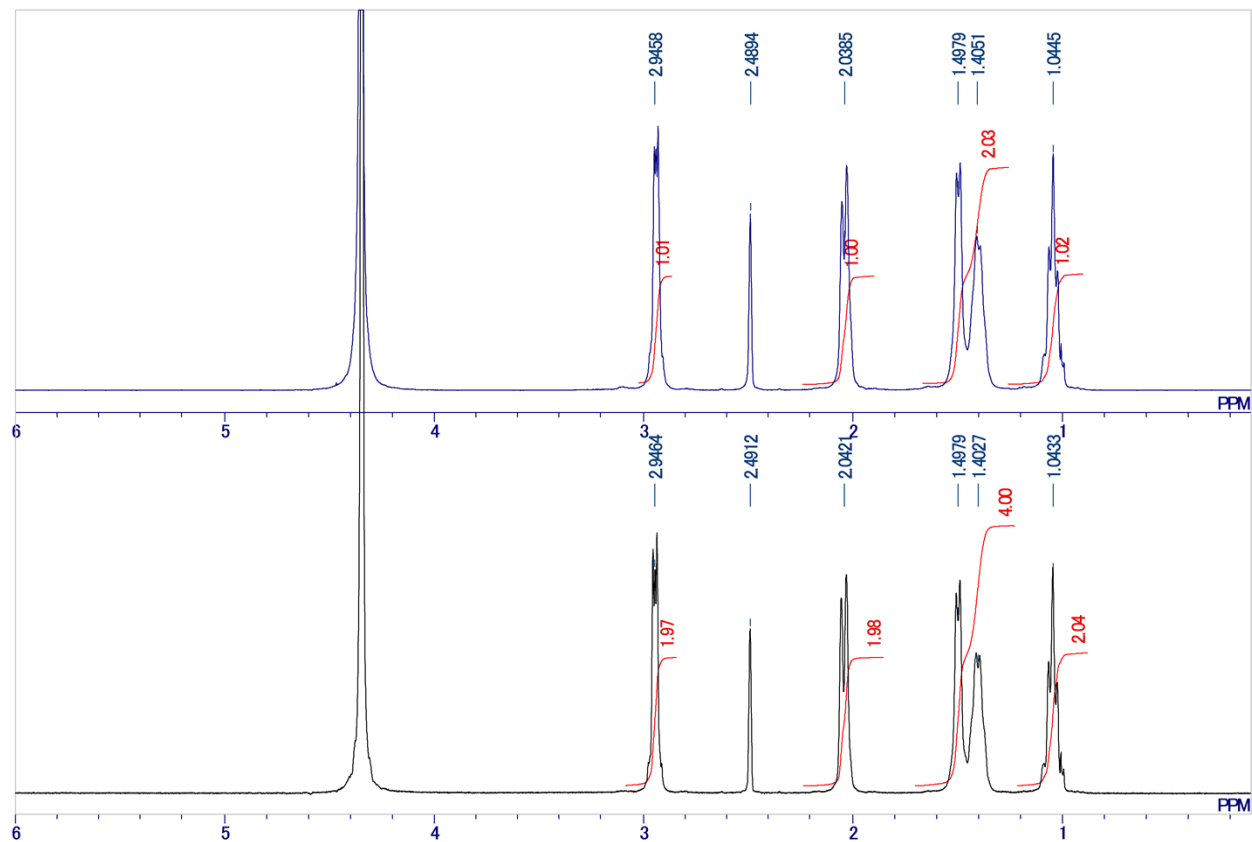

**Figure S11**  $^1\text{H}$  NMR spectrum of compound **2** in (DMSO/ $\text{D}_2\text{O}$ , 3:1) **(a)** just after mixing and **(b)** 3 days.

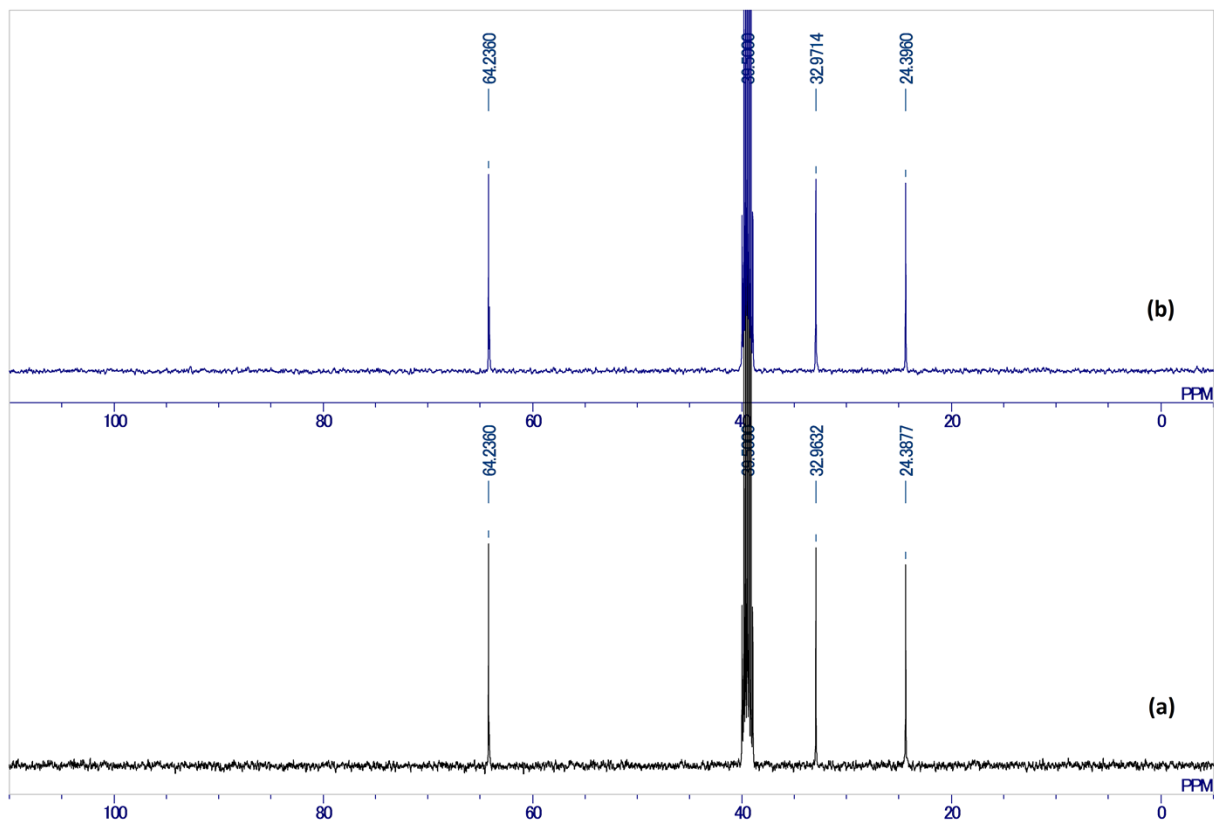

**Figure S12** Solution state  $^{13}\text{C}\{^1\text{H}\}$  NMR spectrum of compound **2** in (DMSO/ $\text{D}_2\text{O}$ , 3:1 v/v ratio) (a) after mixing and (b) 3 days.
